# Supplementary material for: An aberrant sugar modification of BACE1 blocks its lysosomal targeting in Alzheimer's disease
Source: PubMed Central journal article supplement (PMC4328647; doi:10.15252/emmm.201404438), 2015-01-15

Figure S1

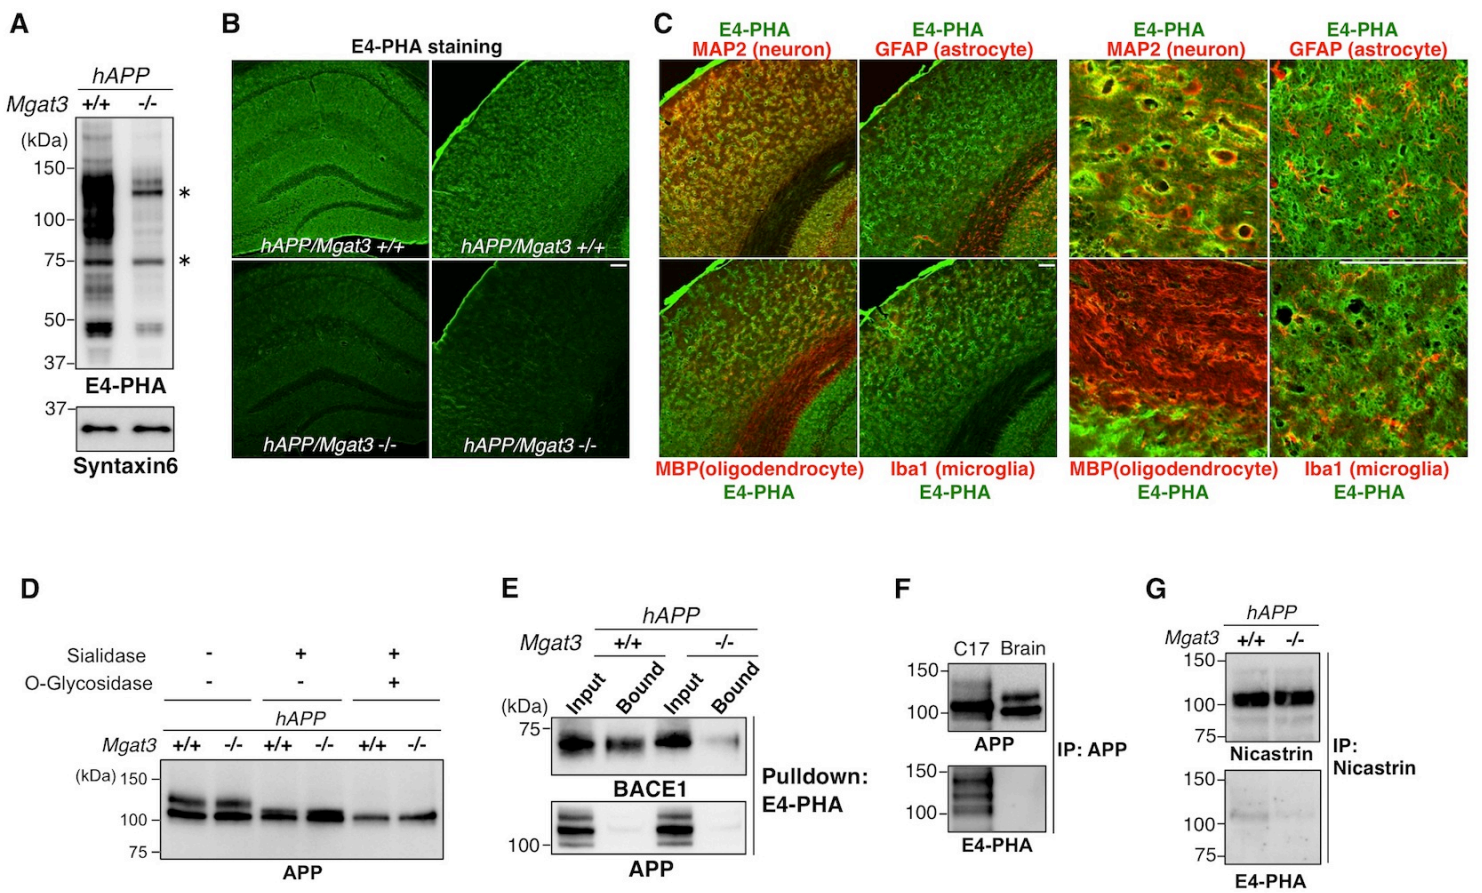

Figure S2

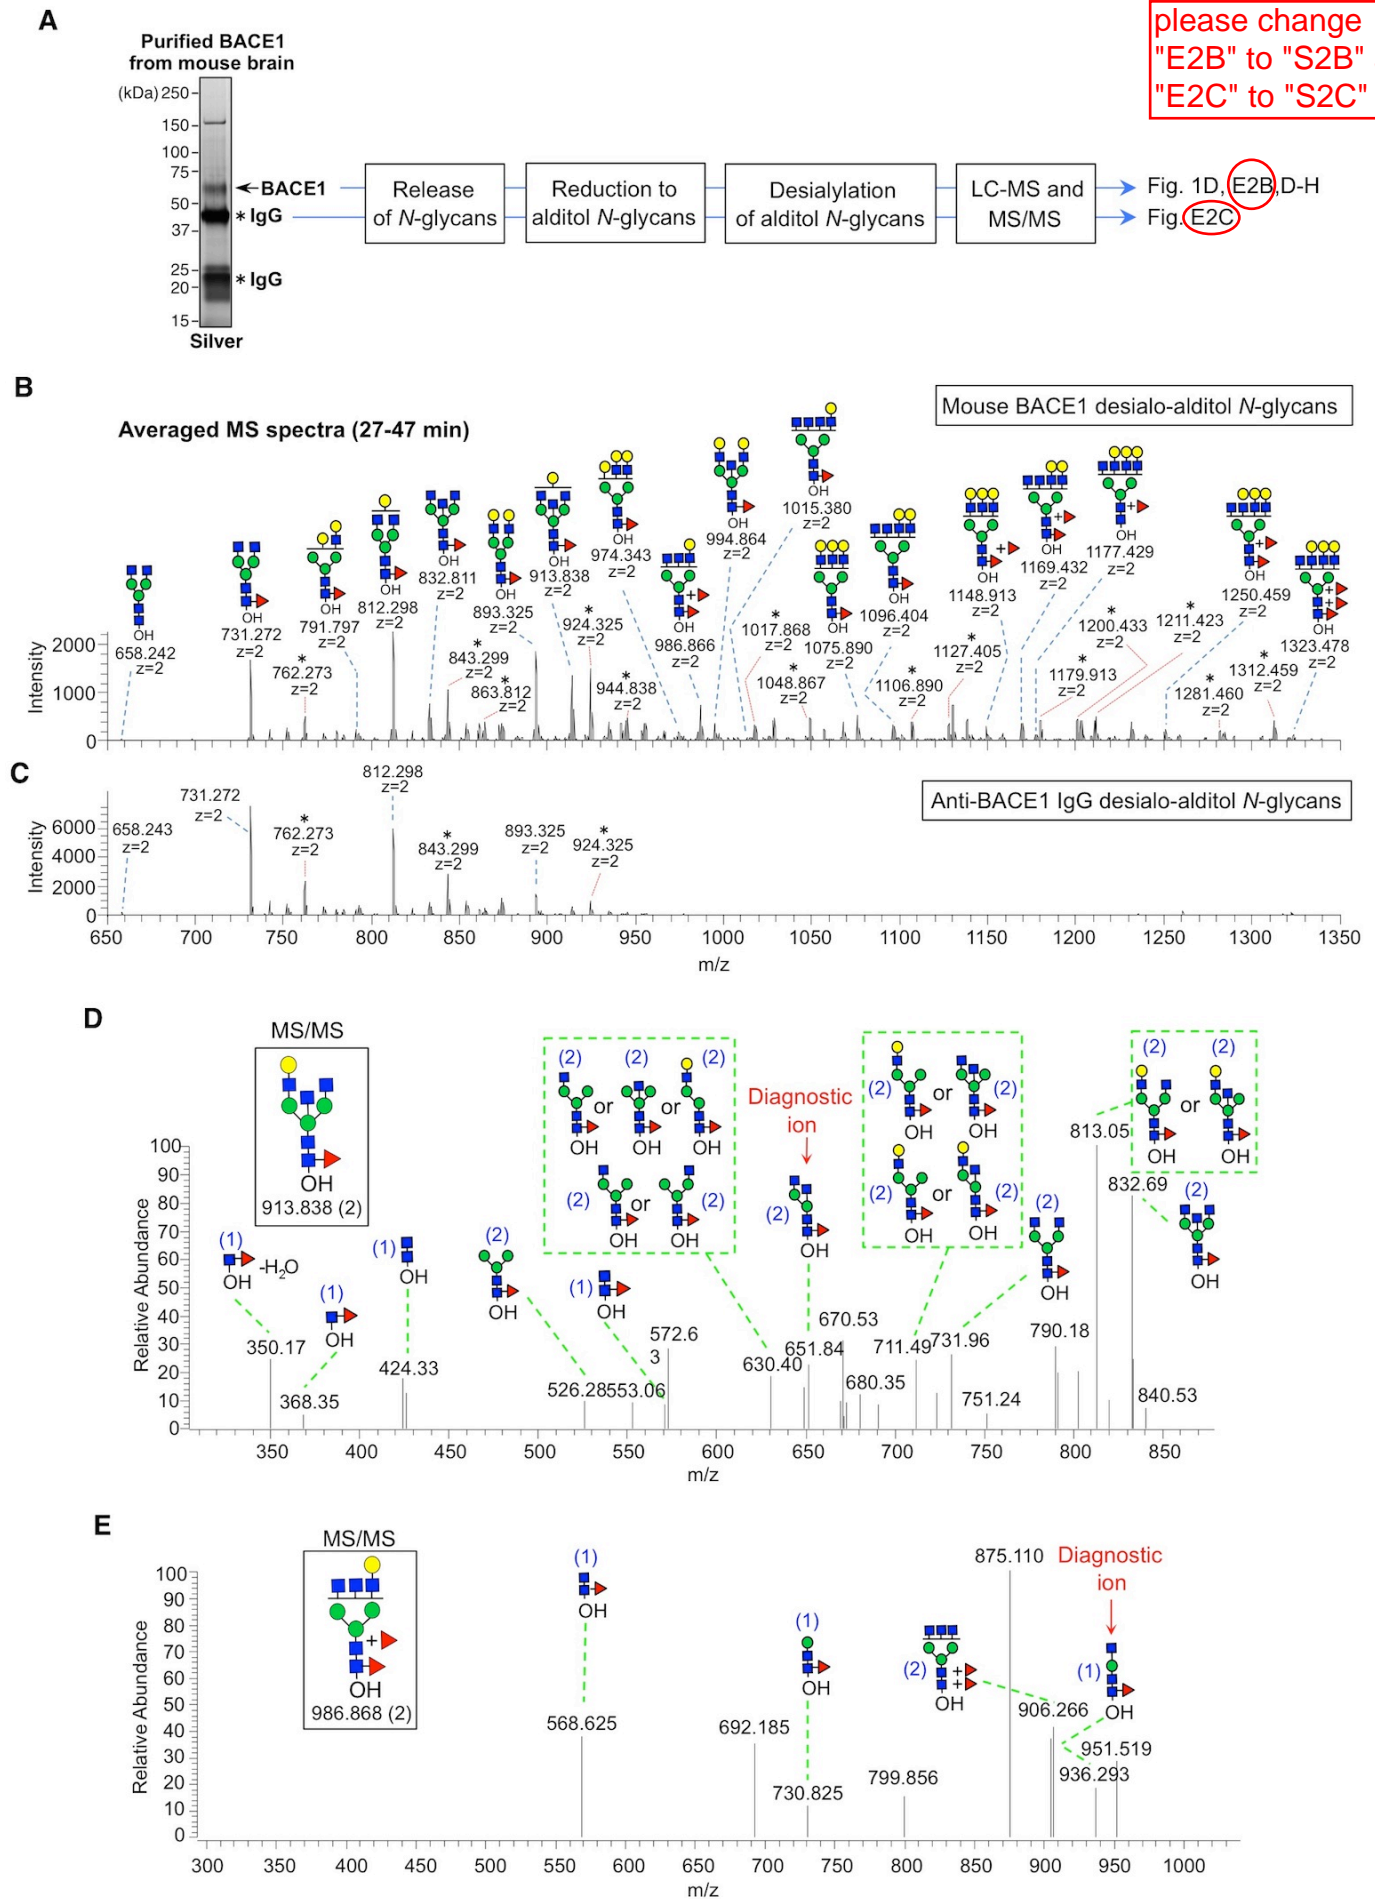

please change "E2B" to "S2B" and "E2C" to "S2C"

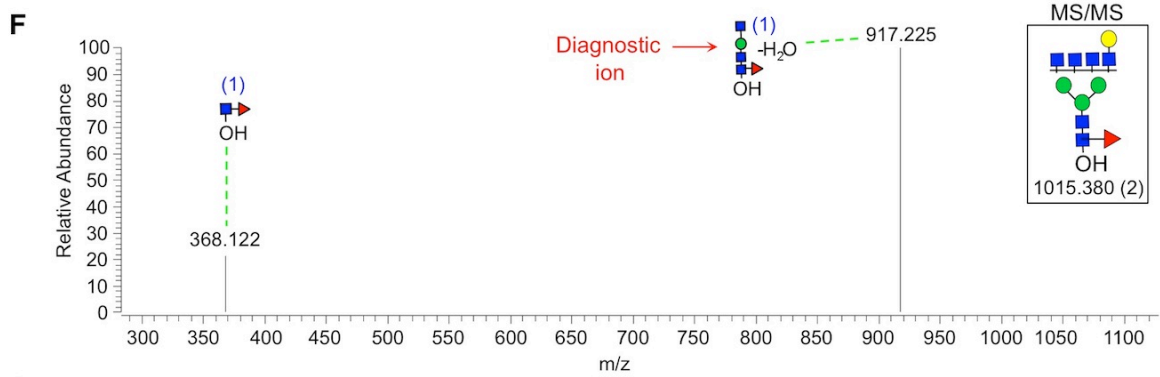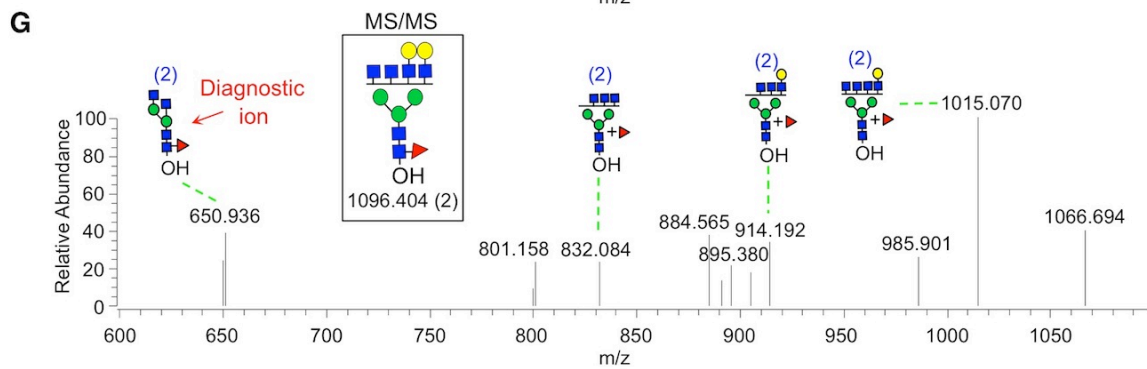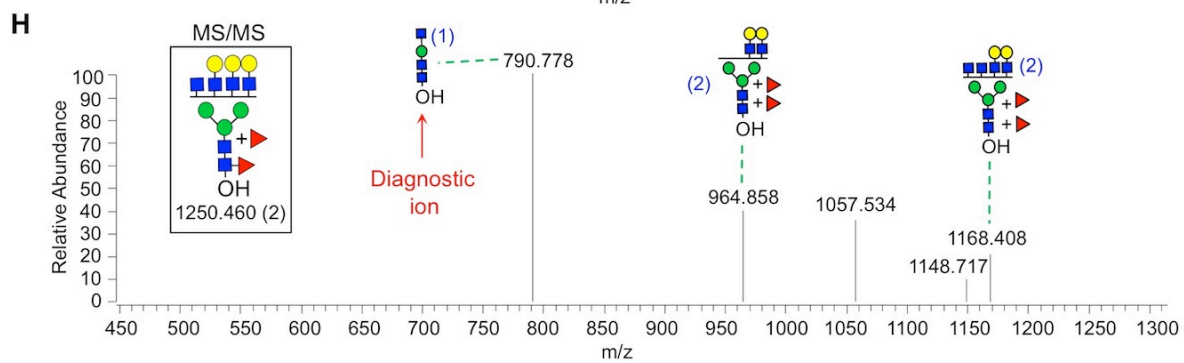

Figure S3

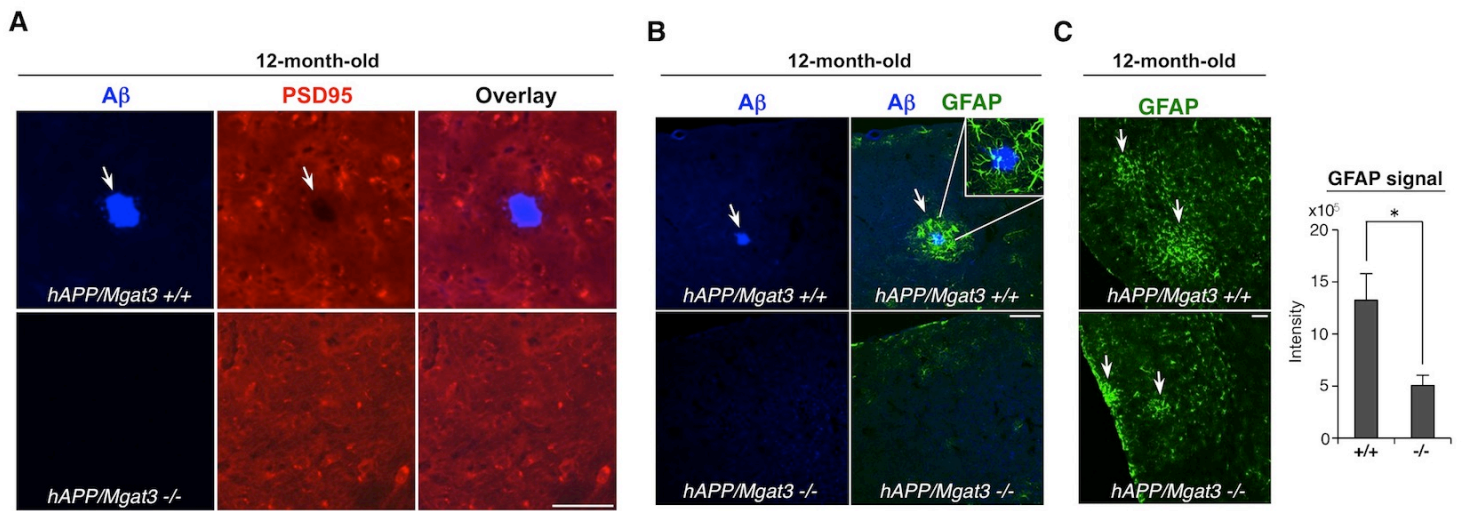

Figure S4

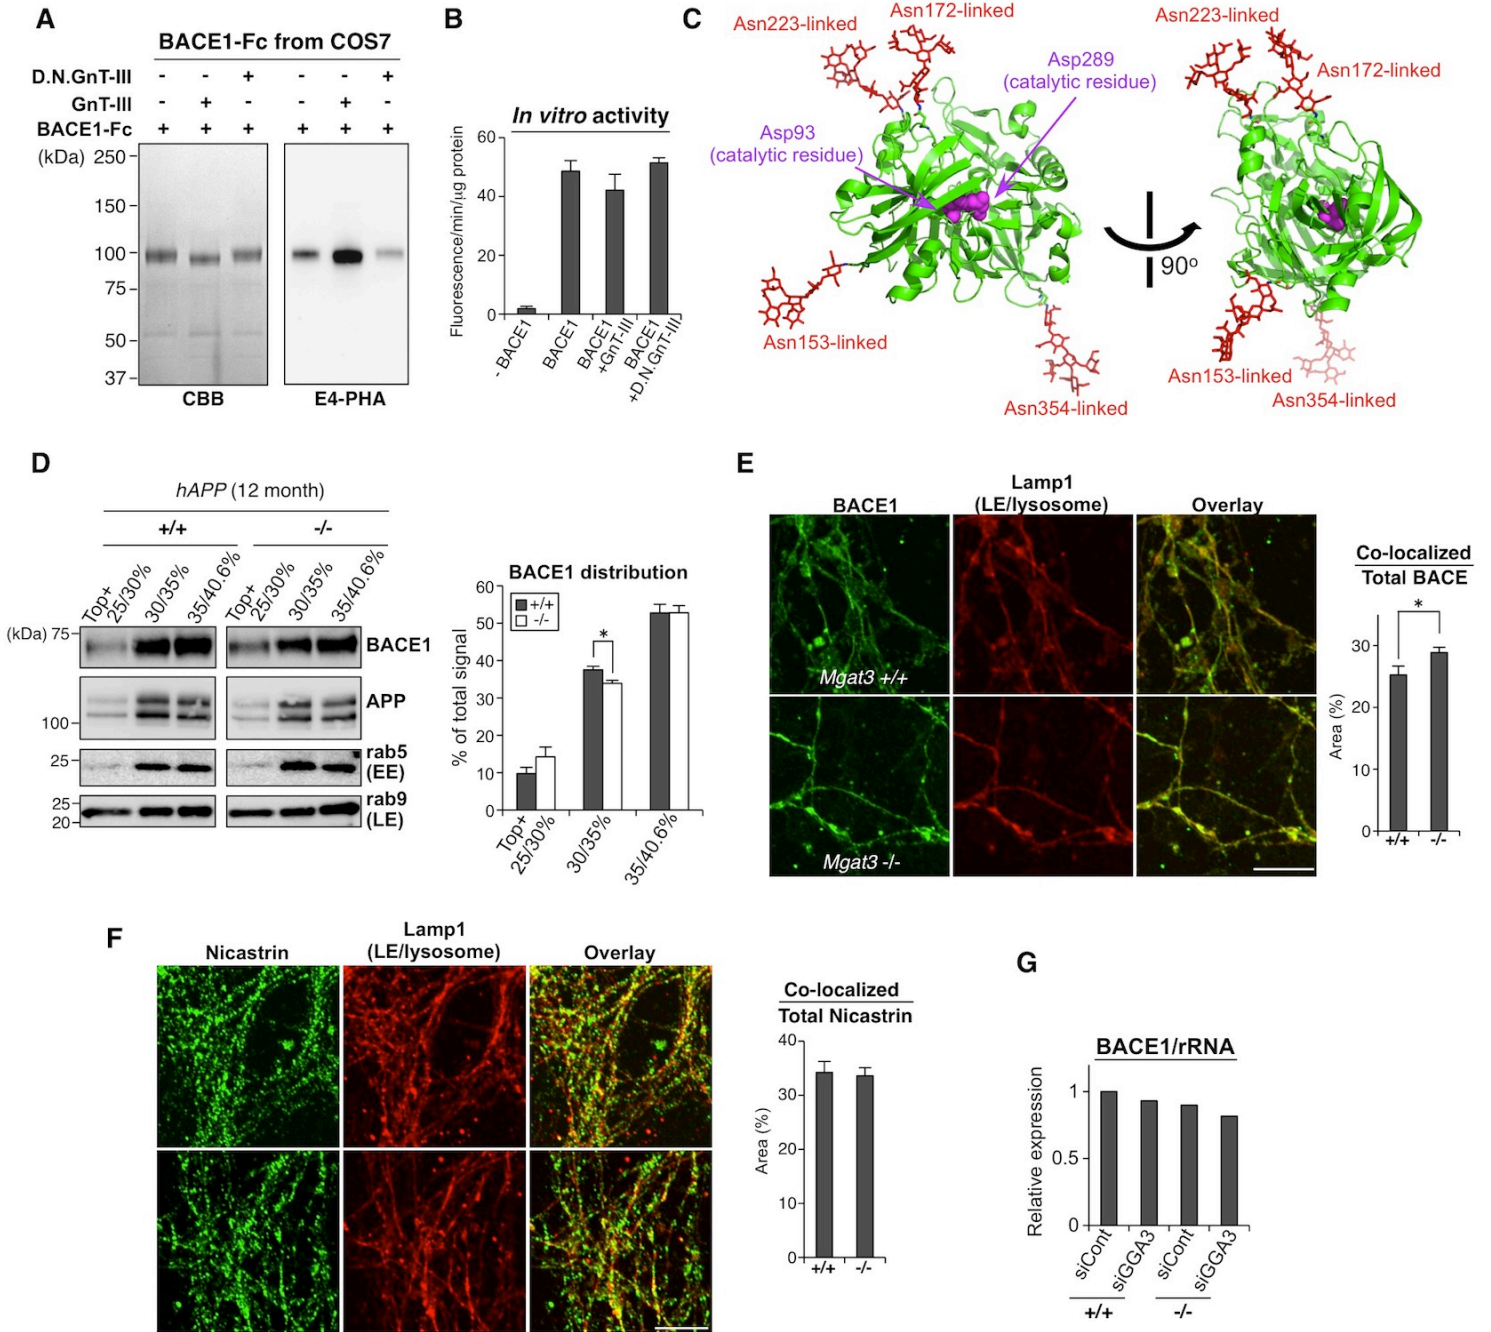

Supplement: emmm0007-0175-sd1.pdf [file emmm0007-0175-sd1.pdf]
