# Supplementary material for: An aberrant sugar modification of BACE1 blocks its lysosomal targeting in Alzheimer's disease
Source: PubMed Central journal article supplement (PMC4328647; doi:10.15252/emmm.201404438), 2015-01-15

**Fig.1B**

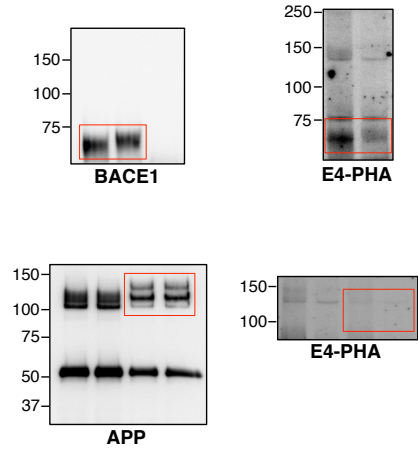

**Fig.1C**

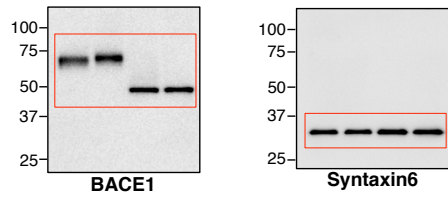

Supplement: emmm0007-0175-sd5.pdf [file emmm0007-0175-sd5.pdf]
