# Supplementary material for: An aberrant sugar modification of BACE1 blocks its lysosomal targeting in Alzheimer's disease
Source: PubMed Central journal article supplement (PMC4328647; doi:10.15252/emmm.201404438), 2015-01-15

**Fig.6B**

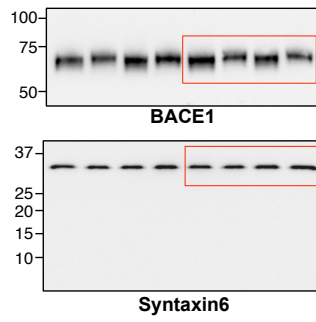

**Fig.6C**

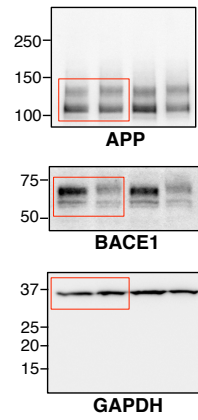

**Fig.6E**

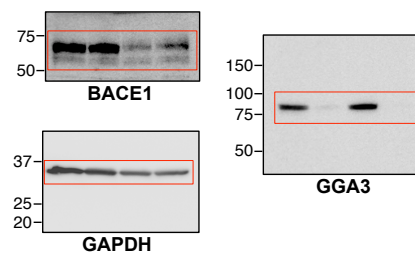

Supplement: emmm0007-0175-sd9.pdf [file emmm0007-0175-sd9.pdf]
